# Supplementary material
Source: Springer Nature journal article supplement (https://www.springermedizin.de/resource/supplementary/13012_2008_253_MOESM2_ESM.pdf/9629562)

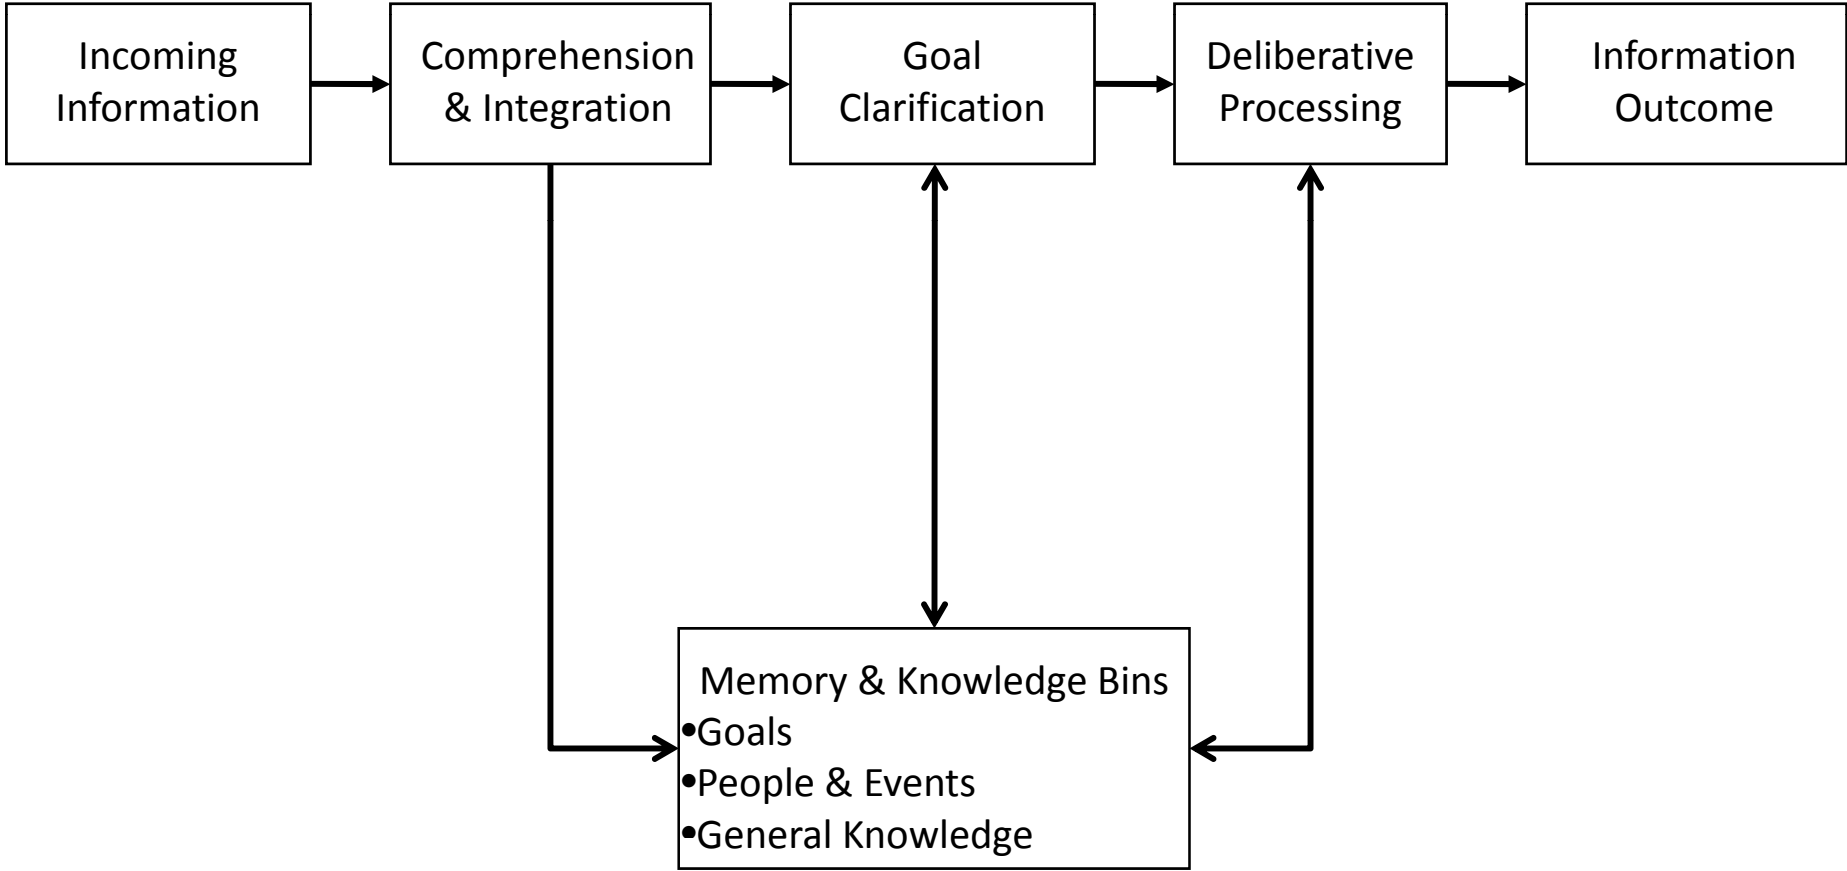

Adapted from Wyer & Srull (1980, 1986)

Supplement: MOESM2 [file 9629562]
